# Supplementary material
Source: publisher figshare collection journal article supplement (https://gsajournals.figshare.com/articles/dataset/_/7392671)
Supplement: Supplementary file 1 [file 1]

**Supplementary Table S1.** *Saccharomyces cerevisiae* strains used in this study.

| Strain      | Relevant genotype                                                          | Source     |
|-------------|----------------------------------------------------------------------------|------------|
| W303        | <i>MATa/α ade2-1 can1-100 his3-11,15 leu2-3,112 trp1-1 ura3-1 rad5-535</i> | 1          |
| DMP2818/1D  | W303 <i>MATa sml1Δ::KANMX</i>                                              | 2          |
| DMP4243/15A | W303 <i>MATa sae2Δ::KANMX sml1Δ::KANMX</i>                                 | This study |
| YLL490      | W303 <i>MATa mec1Δ::HIS3 sml1Δ::KANMX</i>                                  | 2          |
| DMP4243/4C  | W303 <i>MATa mec1Δ::HIS3 sae2Δ::KANMX sml1Δ::KANMX</i>                     | This study |
| YLL3939     | W303 <i>MATa mec1Δ::HIS3 sae2-ms::LEU2 sml1Δ::KANMX</i>                    | This study |
| YLL1070     | W303 <i>MATa sae2Δ::HIS3</i>                                               | 3          |
| YLL3942     | W303 <i>MATa sae2-ms::LEU2</i>                                             | This study |
| YLL254      | W303 <i>MATa rad27Δ::KANMX</i>                                             | 4          |
| DMP5671/4C  | W303 <i>MATa sae2Δ::KANMX</i>                                              | This study |
| DMP6398/2A  | W303 <i>MATa sae2-ms::LEU2</i>                                             | This study |
| YLL2415     | W303 <i>MATa sgs1Δ::URA3</i>                                               | This study |
| DMP6715/7B  | W303 <i>MATa sae2-ms::LEU2 rad27Δ::KANMX</i>                               | This study |
| DMP6716/1D  | W303 <i>MATa sae2-ms::LEU2 sgs1Δ::URA3</i>                                 | This study |
| DMP6725/11D | W303 <i>MATa sae2-ms::LEU2 exo1Δ::LEU2</i>                                 | This study |
| YLL2402     | W303 <i>MATa exo1Δ::LEU2</i>                                               | 1          |
| YLL2403     | W303 <i>MATa sae2Δ::KANMX exo1Δ::LEU2</i>                                  | 1          |
| DMP6727/20B | W303 <i>MATa tel1Δ::HIS mec1Δ::HIS3 sae2-ms::LEU2 sml1Δ::KANMX</i>         | This study |
| DMP6727/15B | W303 <i>MATa tel1Δ::HIS mec1Δ::HIS3 sml1Δ::KANMX</i>                       | This study |
| DMP3335/1A  | W303 <i>MATa tel1Δ::HIS sml1Δ::KANMX</i>                                   | This study |
| DMP6719/10C | W303 <i>MATa rad9Δ::URA3 mec1Δ::HIS3 sae2-ms::LEU2 sml1Δ::KANMX</i>        | This study |
| DMP4726/6C  | W303 <i>MATa rad9Δ::URA3 mec1Δ::HIS3 sml1Δ::KANMX</i>                      | 5          |
| DMP6719/7B  | W303 <i>MATa rad9Δ::URA3 sae2-ms::LEU2 sml1Δ::KANMX</i>                    | This study |
| DMP4726/15A | W303 <i>MATa rad9Δ::URA3 sml1Δ::KANMX</i>                                  | This study |
| DMP6713/4D  | W303 <i>MATa sae2-ms::LEU2 sml1Δ::KANMX</i>                                | This study |
| DMP6721/20C | W303 <i>MATa rad53-K227A::KANMX mec1Δ::HIS3 sae2-ms::LEU2 sml1Δ::KANMX</i> | This study |
| DMP6721/20B | W303 <i>MATa rad53-K227A::KANMX mec1Δ::HIS3 sml1Δ::KANMX</i>               | This study |
| DMP6721/14C | W303 <i>MATa rad53-K227A::KANMX sae2-ms::LEU2 sml1Δ::KANMX</i>             | This study |
| YLL590      | W303 <i>MATa rad53-K227A::KANMX sml1Δ::KANMX</i>                           | 2          |
| DMP6724/32D | W303 <i>MATa ddc1Δ::KANMX mec1Δ::HIS3 sae2-ms::LEU2 sml1Δ::KANMX</i>       | This study |
| DMP6724/33D | W303 <i>MATa ddc1Δ::KANMX mec1Δ::HIS3 sml1Δ::KANMX</i>                     | This study |
| DMP6724/29C | W303 <i>MATa ddc1Δ::KANMX sae2-ms::LEU2 sml1Δ::KANMX</i>                   | This study |
| DMP6724/14B | W303 <i>MATa ddc1Δ::KANMX sml1Δ::KANMX</i>                                 | This study |
| DMP6732/20C | W303 <i>MATa mec1Δ::HIS3 sae2-P217T,A230V::LEU2 sml1Δ::KANMX</i>           | This study |
| DMP6731/7A  | W303 <i>MATa mec1Δ::HIS3 sae2-S134L::LEU2 sml1Δ::KANMX</i>                 | This study |

|             |                                                                                                                               |            |
|-------------|-------------------------------------------------------------------------------------------------------------------------------|------------|
| DMP6730/11D | W303 <i>MATa mec1Δ::HIS3 sae2Δ::KANMX::sae2-S134D::LEU2 sml1Δ::KANMX</i>                                                      | This study |
| DMP6729/2D  | W303 <i>MATa mec1Δ::HIS3 sae2Δ::KANMX::sae2-S134A::LEU2 sml1Δ::KANMX</i>                                                      | This study |
| DMP6731/15A | W303 <i>MATa sae2-S134L::LEU2</i>                                                                                             | This study |
| DMP6730/4D  | W303 <i>MATa sae2Δ::KANMX::sae2-S134D::LEU2</i>                                                                               | This study |
| DMP6729/9D  | W303 <i>MATa sae2Δ::KANMX::sae2-S134A::LEU2</i>                                                                               | This study |
| DMP6732/19B | W303 <i>MATa sae2-P217T,A230V::LEU2</i>                                                                                       | This study |
| DMP6922     | W303 <i>MATa/α SAE2-3HA::URA3/SAE2-18MYC::TRP1</i>                                                                            | This study |
| DMP6935     | W303 <i>MATa/α sae2-ms-3HA::TRP1::LEU2/SAE2-18MYC::HIS3</i>                                                                   | This study |
| DMP6934     | W303 <i>MATa/α sae2-ms-3HA::TRP1::LEU2/sae2-ms-18MYC::URA3 ::LEU2</i>                                                         | This study |
| DMP6923     | W303 <i>MATa/α SAE2/SAE2-18MYC::TRP1</i>                                                                                      | This study |
| YMV45       | <i>ho hml::ADE1 mata::hisG hmr::ADE1 leu2::leu2(Asp718-SalI)- URA3-pBR332-MATa ade3::GAL::HO ade1 lys5 ura3-52 trp1::hisG</i> | 6          |
| YLL1621     | YMV45 <i>sae2Δ::KANMX</i>                                                                                                     | 7          |
| YLL3956     | YMV45 <i>sae2-ms::HPHMX</i>                                                                                                   | This study |
| YJK40.6     | <i>MATΔ hmlΔ hmrΔ can1 lys5 ade2 leu2 trp1 ura3 his3 ade3::GAL-HO VII::TRP1-HO LacI-GFP::URA3 LacO::LYS5 LacO::KanR</i>       | 8          |
| YLL1709     | YJK40.6 <i>sae2Δ::NATMX</i>                                                                                                   | 9          |
| YLL3945     | YJK40.6 <i>sae2-ms::LEU2</i>                                                                                                  | This study |
| JKM139      | <i>MATa ho hmlΔ::ADE1 hmrΔ::ADE1 ade1-100 leu2-3,112 lys5 trp1::hisG ura3-52 ade3::GAL-HO</i>                                 | 10         |
| YLL1523     | JKM139 <i>MATa sae2Δ::KANMX</i>                                                                                               | 7          |
| YLL3941     | JKM139 <i>MATa sae2-ms::LEU2</i>                                                                                              | This study |
| YLL3421     | JKM139 <i>MATa RAD9-3HA::TRP1</i>                                                                                             | 11         |
| DMP6911/4B  | JKM139 <i>MATa sae2Δ::KANMX RAD9-3HA::TRP1</i>                                                                                | This study |
| DMP6911/1C  | JKM139 <i>MATa sae2-ms::LEU2 RAD9-3HA::TRP1</i>                                                                               | This study |
| YLL1854     | JKM139 <i>MATa MRE11-18MYC::TRP1</i>                                                                                          | 12         |
| DMP6859/1C  | JKM139 <i>MATa MRE11-18MYC::TRP1 sae2Δ::KANMX</i>                                                                             | This study |
| DMP6878/5B  | JKM139 <i>MATa MRE11-18MYC::TRP1 sae2-ms::LEU2</i>                                                                            | This study |
| DMP6879/1B  | JKM139 <i>MATa MRE11-18MYC::TRP1 sae2-S134L::LEU2</i>                                                                         | This study |
| YLL4104     | JKM139 <i>MATa MRE11-H125N-18MYC::TRP1</i>                                                                                    | This study |
| YLL3222     | JKM139 <i>MATa TEL1-3HA::NAT</i>                                                                                              | 11         |
| DMP6860/2B  | JKM139 <i>MATa TEL1-3HA::NAT sae2Δ::KANMX</i>                                                                                 | This study |
| DMP6874/9D  | JKM139 <i>MATa TEL1-3HA::NAT sae2-ms::LEU2</i>                                                                                | This study |
| DMP6875/5C  | JKM139 <i>MATa TEL1-3HA::NAT sae2-S134L::LEU2</i>                                                                             | This study |
| DMP6870/8B  | JKM139 <i>MATa TEL1-3HA::NAT mre11Δ::NAT::mre11-H125N::URA3</i>                                                               | This study |
| YLL2841     | JKM139 <i>MATa sml1Δ::NATMX</i>                                                                                               | 11         |
| 184-10A     | JKM139 <i>MATa mec1Δ::HIS3 sml1Δ::KANMX</i>                                                                                   | 13         |
| DMP6910/6A  | JKM139 <i>MATa mre11Δ::NAT::mre11-H125N::URA3 mec1Δ::HIS3 sml1Δ::KANMX</i>                                                    | This study |
| DMP6910/8C  | JKM139 <i>MATa mre11Δ::NAT::mre11-H125N::URA3 mec1Δ::HIS3 sml1Δ::KANMX</i>                                                    | This study |

|             |                                                                              |            |
|-------------|------------------------------------------------------------------------------|------------|
| DMP6910/12D | JKM139 <i>MATa mre11Δ::NAT::mre11-H125N::URA3 mec1Δ::HIS3 sml1Δ::KANMX</i>   | This study |
| DMP6910/13C | JKM139 <i>MATa mre11Δ::NAT::mre11-H125N::URA3 sml1Δ::KANMX</i>               | This study |
| YLL2769     | JKM139 <i>MATa sae2Δ::KANMX mec1Δ::HIS3 sml1Δ::KANMX</i>                     | This study |
| YLL3940     | JKM139 <i>MATa sae2-ms::LEU2 mec1Δ::HIS3 sml1Δ::KANMX</i>                    | This study |
| DMP6872/2B  | JKM139 <i>MATa sae2-S134L::LEU2 mec1Δ::HIS3 sml1Δ::KANMX</i>                 | This study |
| YLL4081     | JKM139 <i>MATa sae2-S134L::LEU2</i>                                          | This study |
| DMP6990/3D  | JKM139 <i>MATa mre11Δ::NAT::mre11-H125N::URA3 RAD9-3HA::TRP1</i>             | This study |
| DMP6912/1A  | JKM139 <i>MATa sae2-S134L::LEU2 RAD9-3HA::TRP1</i>                           | This study |
| YLL3101     | JKM139 <i>MATa SAE2-3HA::TRP</i>                                             | 14         |
| YLL4102     | JKM139 <i>MATa sae2-ms-3HA::TRP1::LEU2</i>                                   | This study |
| YLL4103     | JKM139 <i>MATa sae2-S134L-3HA::TRP1::LEU2</i>                                | This study |
| HS21        | <i>MATa ade5-1 his7-2 ura3Δ trp1-289 leu2-3,112::p305L3 LEU2 lys2::AluIR</i> | 15         |
| YLL1357     | HS21 <i>MATa sae2Δ::KANMX</i>                                                | 4          |
| YLL3944     | HS21 <i>MATa sae2-ms::HPHMX</i>                                              | This study |
| YLL4000     | HS21 <i>MATa sae2-S134L::HPHMX</i>                                           | This study |

## References

1. Bonetti, D., M. Martina, M. Clerici, G. Lucchini, and M. P. Longhese, 2009 Multiple pathways regulate 3' overhang generation at *S. cerevisiae* telomeres. *Mol. Cell* 35: 70-81.
2. Longhese, M. P., V. Paciotti, H. Neecke, and G. Lucchini, 2000 Checkpoint proteins influence telomeric silencing and length maintenance in budding yeast. *Genetics* 155: 1577-1591.
3. Cassani, C., E. Gobbin, J. Vertemara, W. Wang, A. Marsella, P. Sung, R. Tisi, G. Zampella, and M. P. Longhese, 2018 Structurally distinct Mre11 domains mediate MRX functions in resection, end-tethering and DNA damage resistance. *Nucleic Acids Res.* 46: 2990-3008.
4. Baroni, E., V. Viscardi, H. Cartagena-Lirola, G. Lucchini, and M. P. Longhese, 2004 The functions of budding yeast Sae2 in the DNA damage response require Mec1- and Tel1-dependent phosphorylation. *Mol. Cell. Biol.* 24: 4151-4165.
5. Baldo, V., V. Testoni, G. Lucchini, and M. P. Longhese, 2008 Dominant *TEL1-hy* mutations compensate for Mec1 lack of functions in the DNA damage response. *Mol. Cell. Biol.* 28: 358-375.
6. Vaze, M. B., A. Pellicoli, S. E. Lee, G. Ira, G. Liberi, A. Arbel-Eden, M. Foiani, and J. E. Haber, 2002 Recovery from checkpoint-mediated arrest after repair of a double-strand break requires Srs2 helicase. *Mol. Cell* 10: 373-385.
7. Gobbin, E., M. Villa, M. Gnugnoli, L. Menin, M. Clerici, and M. P. Longhese, 2015 Sae2 function at DNA double-strand breaks is bypassed by dampening Tel1 or Rad53 activity. *PLoS Genet.* 11: e1005685.
8. Kaye, J. A., J. A. Melo, S. K. Cheung, M. B. Vaze, J. E. Haber, and D. P. Toczyski, 2004 DNA breaks promote genomic instability by impeding proper chromosome segregation. *Curr. Biol.* 14: 2096-2106.
9. Clerici, M., D. Mantiero, G. Lucchini, and M. P. Longhese, 2005 The *Saccharomyces cerevisiae* Sae2 protein promotes resection and bridging of double strand break ends. *J. Biol. Chem.* 280: 38631-38638.

10. Lee, S. E., J. K. Moore, A. Holmes, K. Umez, R. D. Kolodner, and J. E. Haber, 1998 *Saccharomyces* Ku70, mre11/rad50 and RPA proteins regulate adaptation to G2/M arrest after DNA damage. *Cell* 94: 399-409.
11. Clerici, M., C. Trovesi, A. Galbiati, G. Lucchini, and M. P. Longhese, 2014 Mec1/ATR regulates the generation of single-stranded DNA that attenuates Tel1/ATM signaling at DNA ends. *EMBO J.* 33: 198-216.
12. Clerici, M., D. Mantiero, G. Lucchini, and M. P. Longhese, 2006 The *Saccharomyces cerevisiae* Sae2 protein negatively regulates DNA damage checkpoint signalling. *EMBO Rep.* 7: 212-218.
13. Mantiero, D., M. Clerici, G. Lucchini, and M. P. Longhese, 2007 Dual role for *Saccharomyces cerevisiae* Tel1 in the checkpoint response to double-strand breaks. *EMBO Rep.* 8: 380-387.
14. Colombo, C. V., C. Trovesi, L. Menin, M. P. Longhese, and M. Clerici, 2017 The RNA binding protein Npl3 promotes resection of DNA double-strand breaks by regulating the levels of Exo1. *Nucleic Acids Res.* 45: 6530-6545.
15. Lobachev, K. S., D. A. Gordenin, and M. A. Resnick, 2002 The Mre11 complex is required for repair of hairpin-capped double-strand breaks and prevention of chromosome rearrangements. *Cell* 108: 183-193.
