# Supplementary material
Source: publisher figshare collection journal article supplement (https://gsajournals.figshare.com/articles/dataset/_/7392671)
Supplement: Supplementary file 2 [file 1]

**Figure S1**

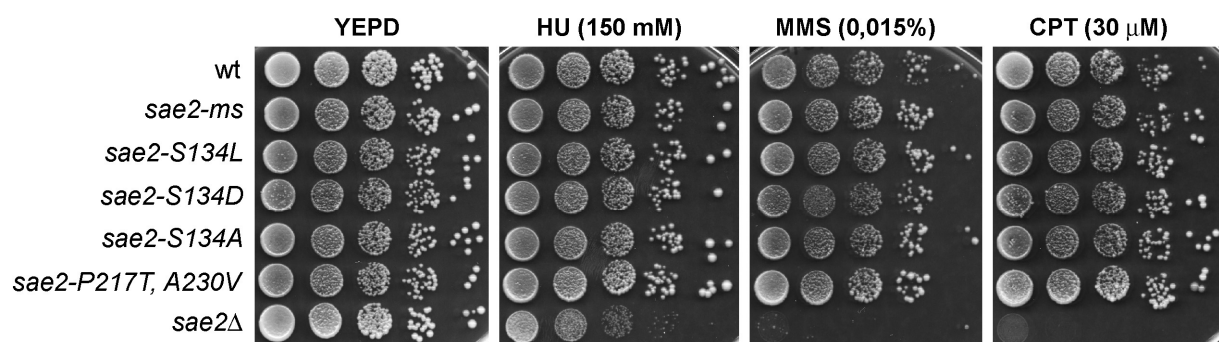

**Figure S1.** Sae2-*ms* and Sae2-S134L do not cause DNA damage sensitivity. Exponentially growing cells were serially diluted (1:10) and each dilution was spotted out onto YEPD plates with or without HU, MMS or CPT at the indicated concentrations.
